# Supplementary material for: Fe-containing ionic liquids as effective and recoverable oxidants for dissolution of UO2 in the presence of imidazolium chlorides
Source: Royal Society of Chemistry journal article supplement (doi:10.1039/c3dt32832e), 2013-01-01
Supplement: c3dt32832e.pdf [file c3dt32832e.pdf]

## Supporting information

Imidazolium-based Fe-containing Ionic Liquids: effective and recoverable oxidants for the dissolution of  $\text{UO}_2$

*Aining Yao, Taiwei Chu\**

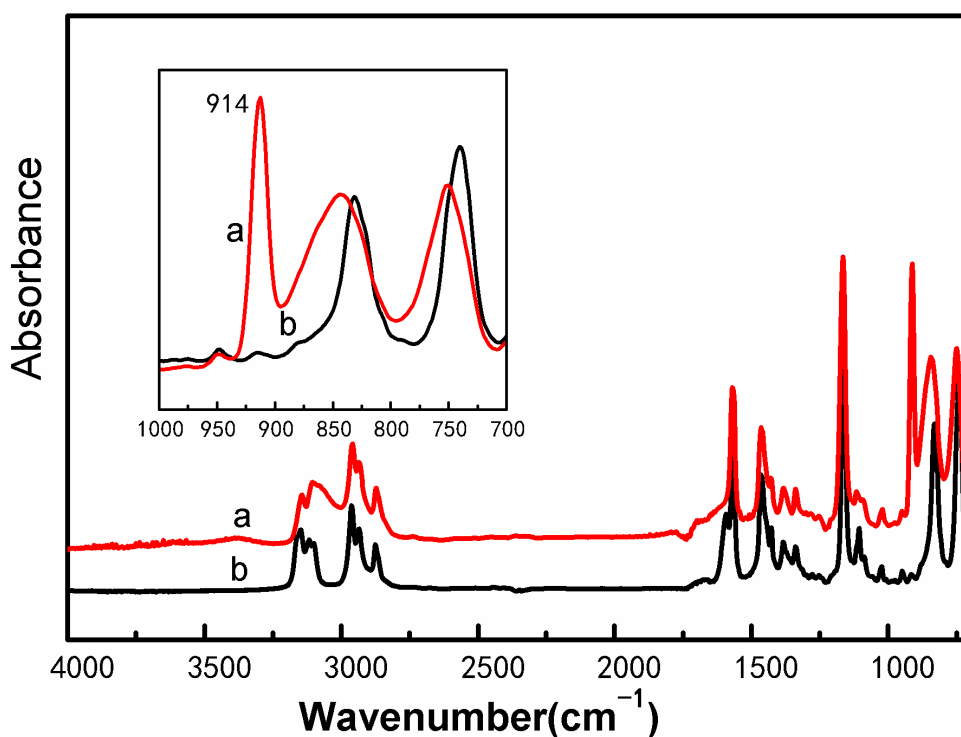

**Figure S1** IR spectra of (a) [Bmim]FeCl<sub>4</sub> only, (b) 200 mg UO<sub>2</sub> dissolved in the mixture of [Bmim]FeCl<sub>4</sub> and [Bmim]Cl (molar ratio: 1/2)

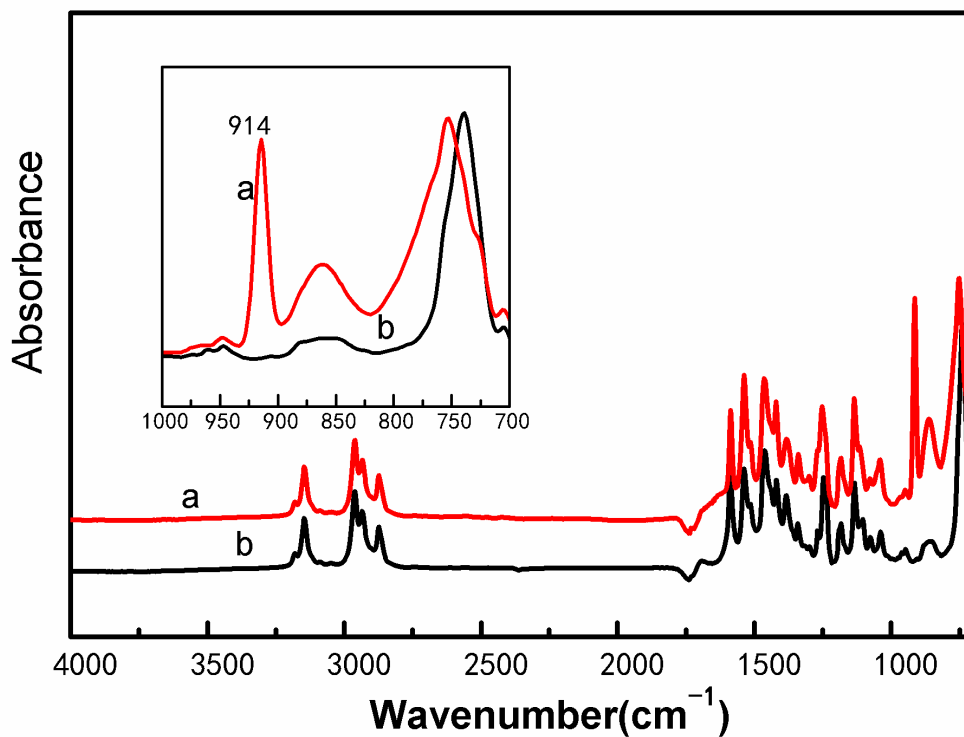

**Figure S2** IR spectra of (a) [Bdmim]FeCl<sub>4</sub> only, (b) 125 mg UO<sub>2</sub> dissolved in the mixture of [Bdmim]FeCl<sub>4</sub> and [Bdmim]Cl (molar ratio: 1/2)

**Table S1** The maximum dissolution amount of  $\text{UO}_2$  in Fe-containing ILs

| 0.5ml [Bmim]FeCl <sub>4</sub><br>(2.02mmol) |                                  | 0.5ml [Emim]FeCl <sub>4</sub><br>(2.31mmol) |                                  | 0.5ml [Bdmim]FeCl <sub>4</sub><br>(1.88mmol) |                                  |
|---------------------------------------------|----------------------------------|---------------------------------------------|----------------------------------|----------------------------------------------|----------------------------------|
| BmimCl/mmol                                 | dissolved<br>UO <sub>2</sub> /mg | EmimCl/mmol                                 | dissolved<br>UO <sub>2</sub> /mg | BdmimCl/mmol                                 | dissolved<br>UO <sub>2</sub> /mg |
| 0                                           | 3.6                              | 0                                           | 3.5                              | 0                                            | 2.1                              |
| 1.1                                         | 83.2                             | 1.3                                         | 84.2                             | 1.1                                          | 30.4                             |
| 2.4                                         | 145.2                            | 2.7                                         | 180.2                            | 2.4                                          | 89.7                             |
| 4.3                                         | 248.6                            | 5.4                                         | 314.9                            | 4.3                                          | 124.1                            |
| 6.4                                         | 248.3                            | 6.6                                         | 314.7                            | 6.3                                          | 123.7                            |
| 7.9                                         | 247.9                            | 7.1                                         | 314.3                            | 7.6                                          | 123.6                            |
